# Supplementary material for: Hedgehog signaling plays a cell-autonomous role in maximizing cardiac developmental potential
Source: Oxford University Press journal article supplement (doi:10.1242/dev.024083), 2008-10-09
Supplement: dev024083-tables1.pdf [file dev024083-tables1.pdf]

**Table S1. Loss of Hedgehog signaling reduces cardiomyocyte number**

| Genotype/condition           | Atrial cardiomyocytes | Ventricular cardiomyocytes | Total cardiomyocytes | <i>n</i> |
|------------------------------|-----------------------|----------------------------|----------------------|----------|
| Wild type                    | 79±10                 | 116±21                     | 195±27               | 22       |
| <i>smo</i> <sup>b577</sup>   | *69±14                | *70±20                     | *139±32              | 22       |
| <i>MZsmo</i> <sup>b577</sup> | *52±8                 | *54±9                      | *106±5               | 7        |
| + CyA                        | *35±14                | *41±19                     | *76±31               | 22       |
| + <i>shh</i> RNA             | *100±20               | 121±17                     | *221±24              | 31       |

Values represent the average number of cardiomyocytes at 52 hpf (±s.d.). Asterisks indicate statistically significant differences from wild type (unpaired *t*-test,  $P < 0.0001$ , except for the *smo*<sup>b577</sup> atrial cardiomyocyte and +*shh* RNA total cardiomyocyte averages where  $P = 0.01$  and  $P = 0.0005$ , respectively).
