# Supplementary material for: Hedgehog signaling plays a cell-autonomous role in maximizing cardiac developmental potential
Source: Oxford University Press journal article supplement (doi:10.1242/dev.024083), 2008-10-09
Supplement: dev024083-tables2.pdf [file dev024083-tables2.pdf]

**Table S2. Reduction of cardiac cell number at early stages in CyA-treated embryos**

| Condition | Stage | Gene         | Cells per heart field | <i>n</i> |
|-----------|-------|--------------|-----------------------|----------|
| Control   | 18 s  | <i>cmlc2</i> | 61±10                 | 28       |
| + CyA     | 18 s  | <i>cmlc2</i> | *31±12                | 34       |
| Control   | 18 s  | <i>vmhc</i>  | 44±7                  | 76       |
| + CyA     | 18 s  | <i>vmhc</i>  | *21±7                 | 150      |
| Control   | 22 s  | <i>amhc</i>  | 56±8                  | 50       |
| + CyA     | 22 s  | <i>amhc</i>  | *34±9                 | 50       |

Values represent the average number of cells per heart field expressing a particular cardiac gene at the designated stage (±s.d.). Asterisks indicate statistically significant differences from control (unpaired *t*-test,  $P<0.0001$ ).
