# Supplementary material for: Hedgehog signaling plays a cell-autonomous role in maximizing cardiac developmental potential
Source: Oxford University Press journal article supplement (doi:10.1242/dev.024083), 2008-10-09
Supplement: dev024083-tables3.pdf [file dev024083-tables3.pdf]

**Table S3. Quantification of the effect of inhibiting Hedgehog signaling at different developmental stages**

| Condition | Stage of CyA addition | <i>vmhc</i> cells per heart field | <i>n</i> |
|-----------|-----------------------|-----------------------------------|----------|
| Control   |                       | 44±6                              | 33       |
| + CyA     | Dome to 30% epiboly   | *16±6                             | 40       |
| + CyA     | Germ ring             | *19±6                             | 46       |
| + CyA     | Tail bud              | *28±5                             | 28       |
| + CyA     | 3 somites             | *30±5                             | 20       |
| + CyA     | 6 somites             | *38±7                             | 18       |
| + CyA     | 10 somites            | 42±9                              | 18       |

Values represent the average number of *vmhc*-expressing cells per heart field at the 18-somite stage (±s.d.). Asterisks indicate statistically significant changes from control (unpaired *t*-test,  $P < 0.004$ ).
