# Supplementary material for: Hedgehog signaling plays a cell-autonomous role in maximizing cardiac developmental potential
Source: Oxford University Press journal article supplement (doi:10.1242/dev.024083), 2008-10-09
Supplement: dev024083-tables4.pdf [file dev024083-tables4.pdf]

**Table S4. Quantification of the effect of removing CyA at different developmental stages**

| Condition       | Stage of CyA removal | <i>vmhc</i> cells per heart field | <i>n</i> |
|-----------------|----------------------|-----------------------------------|----------|
| Ethanol treated | –                    | 43±6                              | 19       |
| + CyA           | Germ ring            | **34±7                            | 11       |
| + CyA           | Three somites        | **21±6                            | 9        |
| + CyA           | Six somites          | *14±5                             | 5        |
| + CyA           | –                    | *13±3                             | 10       |

Values represent the average number of *vmhc*-expressing cells per heart field at the 18-somite stage ( $\pm$ s.d.), following exposure to CyA from dome stage until the stage indicated. A single asterisk indicates statistically significant changes from the ethanol-treated control (*t*-test,  $P < 0.0024$ ). Double asterisks indicate that the treatment also results in a statistically significant change from the CyA control value (*t*-test,  $P < 0.001$ ).
