# Supplementary material for: Hedgehog signaling plays a cell-autonomous role in maximizing cardiac developmental potential
Source: Oxford University Press journal article supplement (doi:10.1242/dev.024083), 2008-10-09
Supplement: dev024083-tables5.pdf [file dev024083-tables5.pdf]

**Table S5. Summary of zebrafish fate mapping experiments in which labeled myocardial progeny were observed**

| Wild-type tier 1 |                        |                    |
|------------------|------------------------|--------------------|
| Angle            | Blastomeres labeled    | Myocardial progeny |
| 95-115           | 4                      | 5                  |
| 94-117           | 4                      | 4                  |
| 91-106           | 4                      | 7                  |
| 91-104           | 4                      | 4                  |
| 87-98            | 6                      | 6                  |
| 80-90            | 4                      | 9                  |
| 76-93            | 5                      | 6                  |
| 74-94            | 4                      | 4                  |
| 61-81            | 4                      | 3                  |
| 57-84            | 4                      | 4                  |
| 51-71            | 4                      | 6                  |
| 46-56            | 6                      | 1                  |
| 44-71            | 4                      | 6                  |
| 42-68            | 4                      | 4                  |
| 30-50            | 5                      | 3                  |
| 28-52            | 4                      | 2                  |
|                  | Mean number of progeny | 4.6                |

| + CyA tier 1 |                        |                    |
|--------------|------------------------|--------------------|
| Angle        | Blastomeres labeled    | Myocardial progeny |
| 123-132      | 4                      | 5                  |
| 92-108       | 5                      | 3                  |
| 92-106       | 4                      | 5                  |
| 78-95        | 4                      | 3                  |
| 78-92        | 4                      | 5                  |
| 77-97        | 5                      | 2                  |
| 63-70        | 4                      | 8                  |
| 31-48        | 4                      | 5                  |
|              | Mean number of progeny | 4.5                |

Each row describes an experimental embryo that yielded labeled ventricular cardiomyocytes, including the angle (degrees from dorsal) of labeled cells, the number of blastomeres labeled, and the number of labeled myocardial progeny.
