# Supplementary material for: Hedgehog signaling plays a cell-autonomous role in maximizing cardiac developmental potential
Source: Oxford University Press journal article supplement (doi:10.1242/dev.024083), 2008-10-09
Supplement: dev024083-tables6.pdf [file dev024083-tables6.pdf]

**Table S6. Summary of zebrafish fate-mapping experiments in which labeled myocardial progeny were not observed in wild-type embryos**

| Wild-type tier 1 |                     |                    |
|------------------|---------------------|--------------------|
| Angle            | Blastomeres labeled | Myocardial progeny |
| 171-175          | 4                   | 0                  |
| 166-178          | 5                   | 0                  |
| 161-175          | 4                   | 0                  |
| 159-168          | 4                   | 0                  |
| 157-175          | 4                   | 0                  |
| 152-170          | 4                   | 0                  |
| 151-162          | 4                   | 0                  |
| 150-169          | 4                   | 0                  |
| 144-167          | 4                   | 0                  |
| 143-159          | 6                   | 0                  |
| 142-158          | 4                   | 0                  |
| 141-159          | 4                   | 0                  |
| 137-153          | 6                   | 0                  |
| 135-150          | 5                   | 0                  |
| 129-144          | 6                   | 0                  |
| 127-150          | 4                   | 0                  |
| 116-128          | 4                   | 0                  |
| 110-124          | 5                   | 0                  |
| 96-110           | 5                   | 0                  |
| 90-120           | 4                   | 0                  |
| 85-102           | 4                   | 0                  |
| 80-100           | 4                   | 0                  |
| 78-90            | 6                   | 0                  |
| 72-86            | 4                   | 0                  |
| 62-75            | 4                   | 0                  |
| 58-82            | 4                   | 0                  |
| 55-77            | 6                   | 0                  |
| 44-68            | 2                   | 0                  |
| 43-68            | 5                   | 0                  |
| 39-62            | 4                   | 0                  |
| 37-49            | 4                   | 0                  |
| 36-58            | 4                   | 0                  |
| 32-48            | 4                   | 0                  |
| 30-54            | 5                   | 0                  |
| 26-42            | 4                   | 0                  |
| 21-40            | 4                   | 0                  |
| 15-40            | 4                   | 0                  |
| 10-19            | 4                   | 0                  |
| 8-13             | 4                   | 0                  |
