# Supplementary material for: Hedgehog signaling plays a cell-autonomous role in maximizing cardiac developmental potential
Source: Oxford University Press journal article supplement (doi:10.1242/dev.024083), 2008-10-09
Supplement: dev024083-tables7.pdf [file dev024083-tables7.pdf]

**Table S7. Summary of zebrafish fate-mapping experiments in which labeled myocardial progeny were not observed in CyA-treated embryos**

| + CyA tier 1 |                     |                    |
|--------------|---------------------|--------------------|
| Angle        | Blastomeres labeled | Myocardial progeny |
| 154-171      | 6                   | 0                  |
| 139-165      | 4                   | 0                  |
| 137-161      | 6                   | 0                  |
| 138-156      | 6                   | 0                  |
| 137-146      | 4                   | 0                  |
| 132-151      | 6                   | 0                  |
| 132-145      | 4                   | 0                  |
| 126-150      | 4                   | 0                  |
| 122-138      | 3                   | 0                  |
| 120-136      | 6                   | 0                  |
| 115-137      | 6                   | 0                  |
| 119-130      | 5                   | 0                  |
| 115-130      | 4                   | 0                  |
| 116-126      | 4                   | 0                  |
| 99-120       | 4                   | 0                  |
| 99-116       | 4                   | 0                  |
| 84-99        | 4                   | 0                  |
| 80-102       | 5                   | 0                  |
| 81-93        | 4                   | 0                  |
| 66-88        | 4                   | 0                  |
| 68-85        | 6                   | 0                  |
| 64-84        | 6                   | 0                  |
| 58-88        | 4                   | 0                  |
| 63-78        | 4                   | 0                  |
| 62-74        | 4                   | 0                  |
| 53-68        | 4                   | 0                  |
| 53-66        | 4                   | 0                  |
| 49-68        | 6                   | 0                  |
| 44-70        | 6                   | 0                  |
| 43-64        | 6                   | 0                  |
| 44-61        | 4                   | 0                  |
| 44-61        | 4                   | 0                  |
| 41-64        | 6                   | 0                  |
| 36-59        | 5                   | 0                  |
| 36-58        | 6                   | 0                  |
| 33-56        | 4                   | 0                  |
| 25-43        | 5                   | 0                  |
| 24-35        | 4                   | 0                  |
| 16-32        | 4                   | 0                  |
| 15-29        | 4                   | 0                  |
| 13-28        | 6                   | 0                  |
| 13-18        | 4                   | 0                  |
| 6-26         | 4                   | 0                  |
