# Supplementary material for: Hedgehog signaling plays a cell-autonomous role in maximizing cardiac developmental potential
Source: Oxford University Press journal article supplement (doi:10.1242/dev.024083), 2008-10-09
Supplement: dev024083-tables8.pdf [file dev024083-tables8.pdf]

**Table S8. Summary of myocardial labeling observed in *Gli1-CreER<sup>T2</sup>/+*; *R26R/+* GIFM embryos**

| Embryo | Right ventricle | Left ventricle | Right atrium | Left atrium | Interventricular septum |
|--------|-----------------|----------------|--------------|-------------|-------------------------|
| L1-2   | a, a            |                | b            | b           |                         |
| L1-4   | a, a, a         | b              | b            | b           | a, a                    |
| L1-6   | a, c            | a, a, a        | d            | b           | a, a, a                 |
| L1-7   | b               | a, a           | d            | d           | a, a, a, a              |
| L2-2   | b               |                | e            | e           | e                       |
| L2-14  | e               | e              |              |             |                         |
| L3-1   | a, a            | e              | a, a         | e           |                         |
| L3-4   | a, b, b         | a, a, a        | a, a         | a, a        |                         |

Each row describes an experimental mouse embryo that yielded labeled cardiomyocytes. For litter 1 (L1), tamoxifen (TM) was administered at 5 pm on E6.5 and hearts were examined at E18.5. For L2, TM was administered at 5 pm on E6.5 and hearts were examined at E15.5. For L3, TM was administered at 5 pm on E7.5 and hearts were examined at E12.5. Each lower-case letter indicates the size and location of an individual patch of labeled cardiomyocytes, as follows:

a, small patch of cells; b, modest patch of cells; c, large patch of cells; d, labeling throughout most of the myocardium; e, labeling in just a few cells.
