# Supplementary material for: Hedgehog signaling plays a cell-autonomous role in maximizing cardiac developmental potential
Source: Oxford University Press journal article supplement (doi:10.1242/dev.024083), 2008-10-09
Supplement: dev024083-tables9.pdf [file dev024083-tables9.pdf]

**Table S9. Effectiveness of myocardial contribution of donor-derived cells**

| Session | Donor/host genotypes | Transplants with myocardial contribution | Myocardial contribution frequency |
|---------|----------------------|------------------------------------------|-----------------------------------|
| 1       | WT/WT                | 6/30                                     | 20%                               |
|         | <i>MZsmo</i> /WT     | 2/18                                     | 11%                               |
| 2       | WT/WT                | 3/21                                     | 14%                               |
|         | <i>MZsmo</i> /WT     | 0/15                                     | 0%                                |
| 3       | WT/WT                | 4/46                                     | 9%                                |
|         | <i>MZsmo</i> /WT     | 2/31                                     | 6%                                |
| 4       | WT/WT                | 4/17                                     | 24%                               |
|         | <i>MZsmo</i> /WT     | 4/26                                     | 15%                               |
| 5       | WT/WT                | 7/28                                     | 25%                               |
|         | <i>MZsmo</i> /WT     | 3/31                                     | 10%                               |
| 6       | WT/WT                | 5/31                                     | 16%                               |
|         | <i>MZsmo</i> /WT     | 2/27                                     | 7%                                |

In six independent transplantation sessions, donor embryos were derived from clutches that contained both wild-type and *MZsmo* mutant embryos (see Materials and methods), and myocardial contribution was assessed at 48 hpf.
